# Supplementary material
Source: Springer Nature journal article supplement (https://www.springermedizin.de/resource/supplementary/13034_2013_276_MOESM1_ESM.docx/9652682)
Supplement: MOESM1 [file 9652682]

**Authors**

**Corresponding author: Manon RIVIÈRE**

Clinical Psychologist, PhD student in Clinical Psychology, CAPS EA4050, University of Poitiers

Professional address:

Maison des Sciences de l’Homme et de la Société

5, Rue Théodore Lefebvre (Bât. A5)

86000 Poitiers

Personal address:

480 Route du Margouillet

86550 Mignaloux-Beauvoir

 Phone: 06.23.51.38.84

 E-mail: [manonriv@hotmail.com](mailto:pascal.keller@univ-poitiers.fr)

**Marion HAZA**

Clinical Psychologist, President of ARCAD Association, Senior Lecturer, CAPS EA4050, University of Poitiers, Member of the ICLA

Professional address:

Université de Poitiers, EA 4050 - Laboratoire CAPS

3, Rue Théodore Lefebvre (Bât. A4)

86000 Poitiers

Personal address:

45 Rue de Lucie

33560 Carbon blanc

Phone: 06.42.33.62.37

E-mail: [marion.haza@gmail.com](mailto:marion.haza@gmail.com)
